# Supplementary material for: Controllable synthesis of porous tubular carbon by a Ag+-ligand-assisted Stöber-silica/carbon assembly process
Source: Royal Society of Chemistry journal article supplement (doi:10.1039/d0nr07785b), 2021-01-01
Supplement: d0nr07785b1.pdf [file d0nr07785b1.pdf]

## Supporting Information

### Controllable Synthesis of Porous Tubular Carbon with a $\text{Ag}^+$ -ligand Assisted Stober-Silica/Carbon Assembly Process

Yang-Lin Shen,<sup>a</sup> Jun-Ling Jin,<sup>b</sup> Ning Chen,<sup>a</sup> Peng Ju Li,<sup>a</sup> Ting Xu,<sup>a</sup> Yun-Peng Xie<sup>\*a</sup> and Xing Lu<sup>\*a</sup>

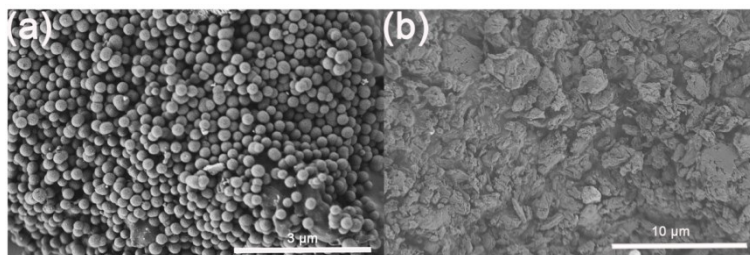

Fig. S1. SEM images of silica/RF hybrid synthesized with 0 mmol (a) and 0.15 mmol  $\text{Ag}^+$  (b).

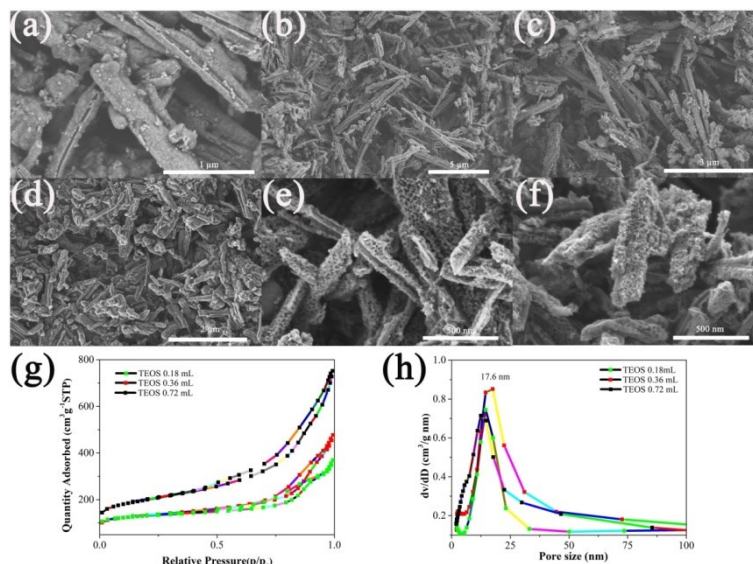

Fig. S2. SEM images of as-synthesized silica/RF hybrids via  $\text{Ag}$ -PFS assisted SSCA with different amount of TEOS: (a) 0.18 mL; (b) 0.36 mL; (c) 0.72 mL. SEM images of carbon obtained by these silica/RF hybrids after carbonization and silica removal: (d) 0.18 mL; (e) 0.36 mL; (f) 0.72 mL. BET measurement of  $\text{N}_2$  adsorption/desorption isotherms (g) and pore size distribution (h) of these tubular carbon samples.

Table S1. BET results summary of these tubular carbon obtained in a different amount of TEOS.

| TEOS (mL) | BET SSA ( $\text{m}^2\text{g}^{-1}$ ) | Pore volume ( $\text{m}^3\text{g}^{-1}$ ) | Pore size (nm) |
|-----------|---------------------------------------|-------------------------------------------|----------------|
| 0.18      | 445                                   | 0.49                                      | 14.3           |
| 0.36      | 452                                   | 0.64                                      | 17.6           |
| 0.72      | 696                                   | 1.04                                      | 12.6           |

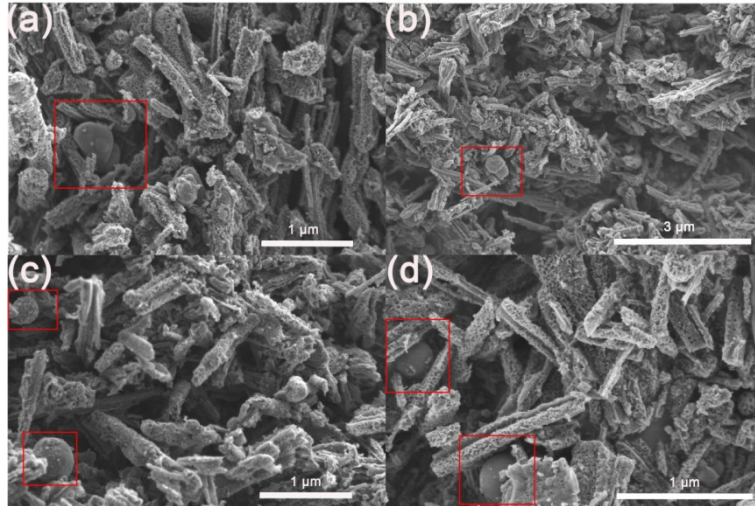

**Fig. S3.** The morphologies of the synthesized porous carbon mixed with carbon spheres (red frame).

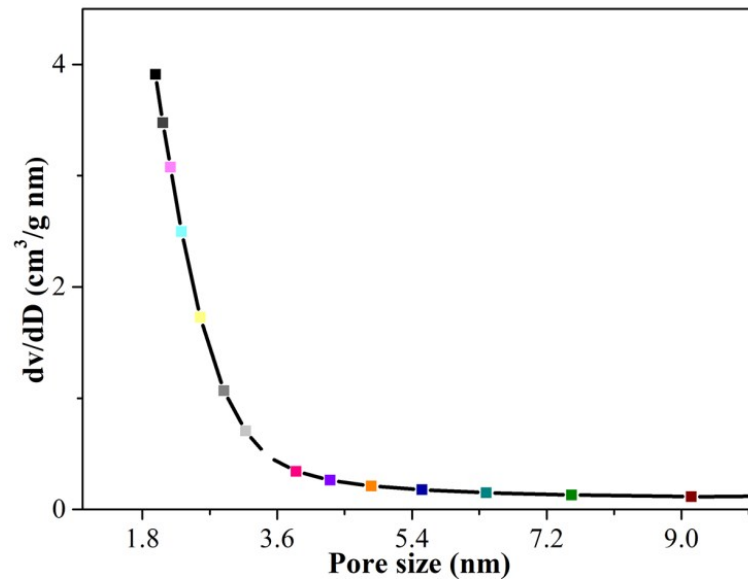

**Fig. S4.** The pore size distribution of **RF2** synthesized with 0.1 ml EDA.

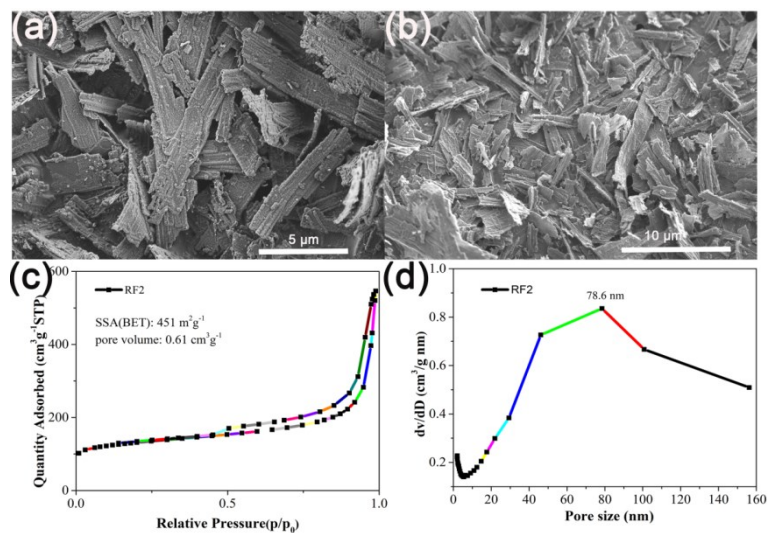

**Fig. S5.** (a) and (b) The as-synthesized silica/RF hybrid and tubular carbon RF2 with 0.5 ml EDA; (c) and (d) BET measurement of N<sub>2</sub> adsorption/desorption isotherms and pore size distribution of the porous tubular carbon, respectively.

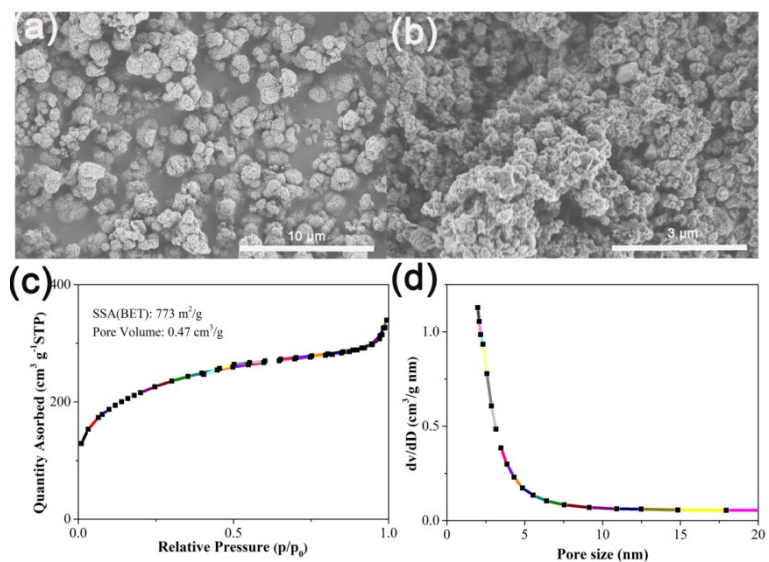

**Fig. S6.** (a) and (b) The as-synthesized silica/polydopamine hybrid and carbon via SSCA without silver; (c) and (d) BET measurement of N<sub>2</sub> adsorption/desorption isotherms and pore size distribution of the porous tubular carbon, respectively.

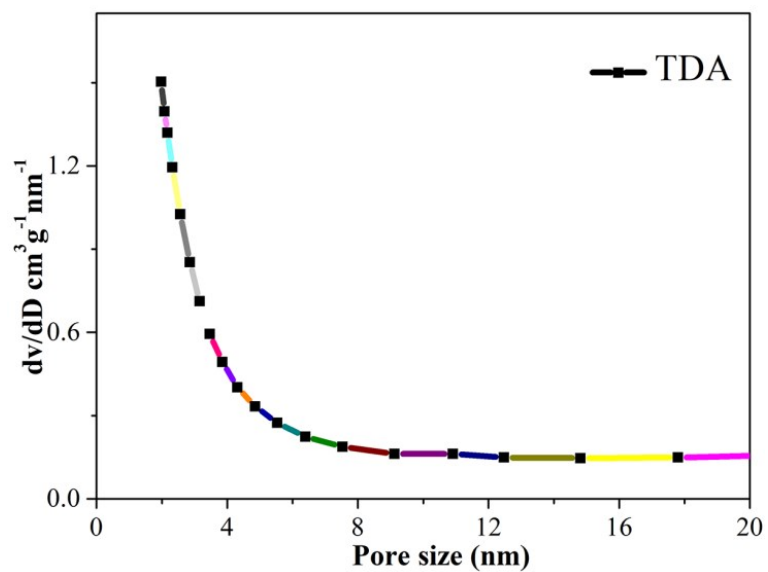

Fig. S7. The pore size distribution of TDA.

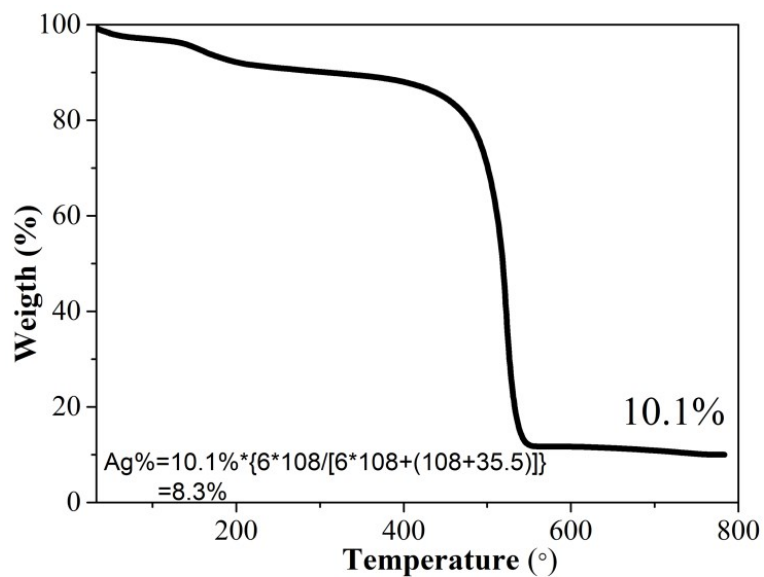

Fig. S8. Thermal gravimetric analysis of TDA and the loading of metal silver determined in combination with XPS results.

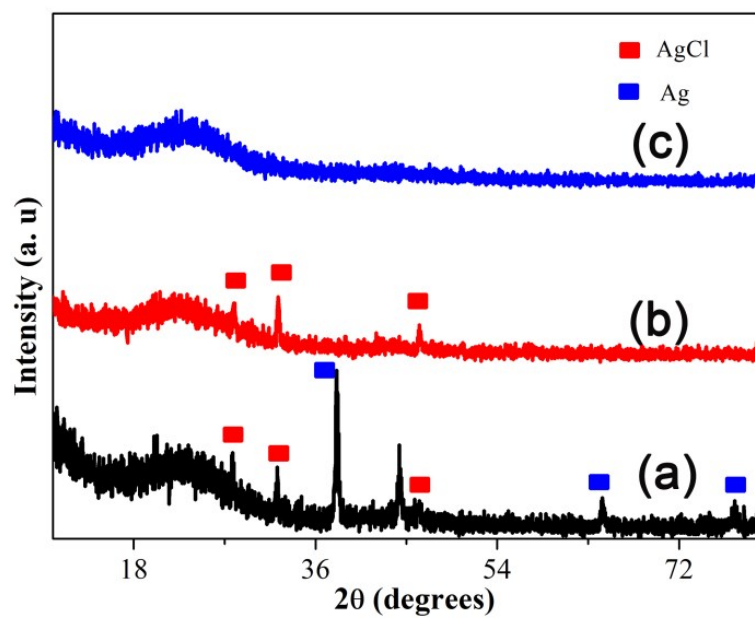

Fig. S9. (a) XRD patterns of TDA; (b) TDA after 2 M HNO<sub>3</sub> treatment; (c) TDA after 2 M HNO<sub>3</sub> and KSCN treatment.

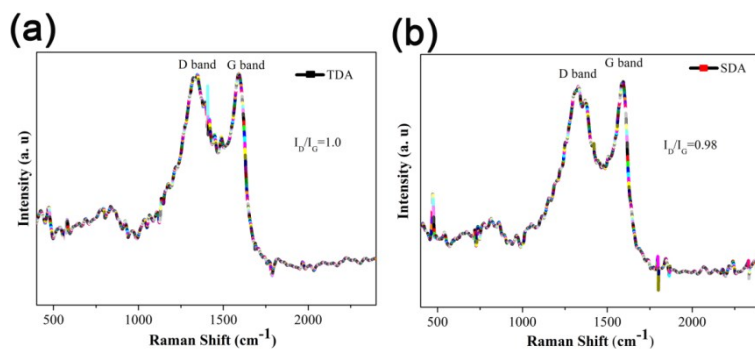

Fig. S10. Raman spectra of TDA (a) and SDA (b).

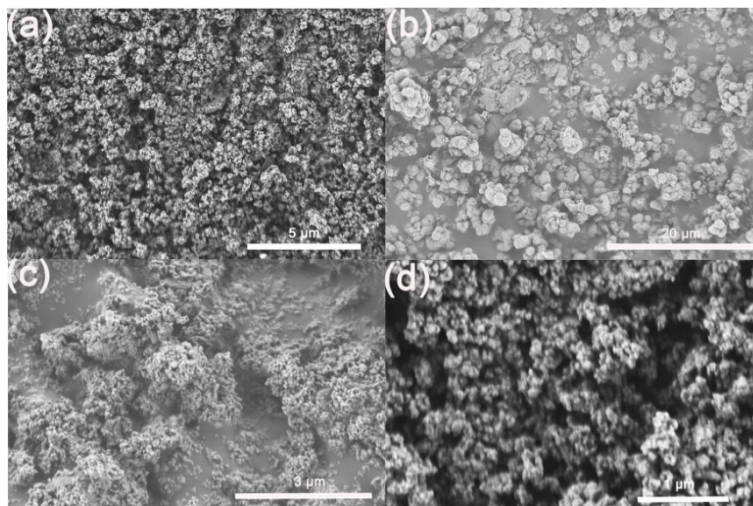

**Fig. S11.** The as-synthesized silica/DA hybrid via SSCA with  $\text{Co}(\text{NO}_3)_2$  (a),  $\text{Pt}(\text{NO}_3)_2$  (b),  $\text{SnCl}_2$  (c) and  $\text{FeCl}_3$  (d).

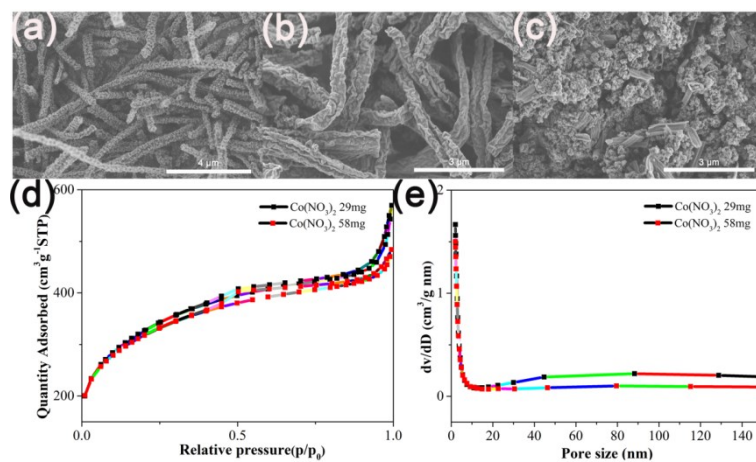

**Fig. S12.** The porous carbon synthesized by SSCA with silver-PFS and different amounts of  $\text{Co}(\text{NO}_3)_2 \cdot 6\text{H}_2\text{O}$ . (a) 29 mg (0.1 mmol); (b) 58 mg (0.2mmol); (c) 116 mg (0.4 mol); (d) and (e) BET measurement of  $\text{N}_2$  adsorption/desorption isotherms and pore size distribution of the porous tubular carbon, respectively.

**Table S2.** BET results summary of the carbon obtained in a different amount of  $\text{Co}(\text{NO}_3)_2 \cdot 6\text{H}_2\text{O}$

| $\text{Co}(\text{NO}_3)_2$<br>(mg) | BET SSA<br>( $\text{m}^2\text{g}^{-1}$ ) | Pore volume<br>( $\text{m}^3\text{g}^{-1}$ ) | Pore size<br>(nm) |
|------------------------------------|------------------------------------------|----------------------------------------------|-------------------|
| 29                                 | 1170                                     | 0.76                                         | < 2               |
| 58                                 | 1129                                     | 0.69                                         | < 2               |

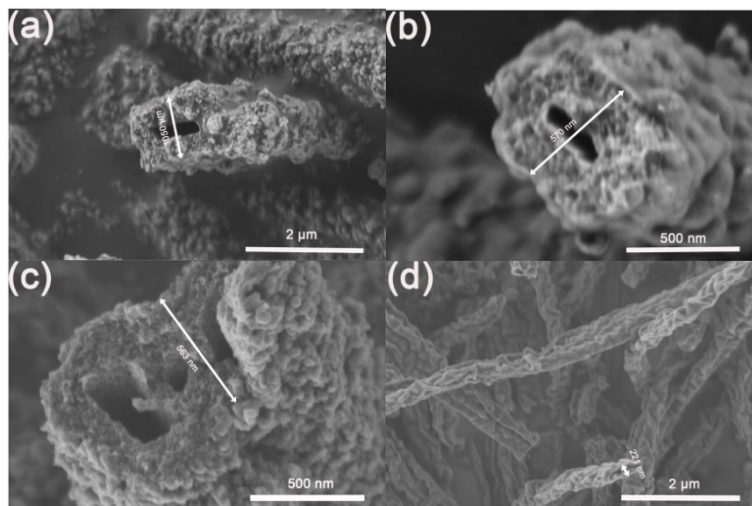

**Fig. S13.** (a) and (c) The as-synthesized silica/polydopamine hybrid and TDA carbon with 0mg  $\text{Co}(\text{NO}_3)_2 \cdot 6\text{H}_2\text{O}$ ; (b) and (d) The as-synthesized silica/polydopamine hybrid and TDA carbon with 58mg  $\text{Co}(\text{NO}_3)_2 \cdot 6\text{H}_2\text{O}$ .

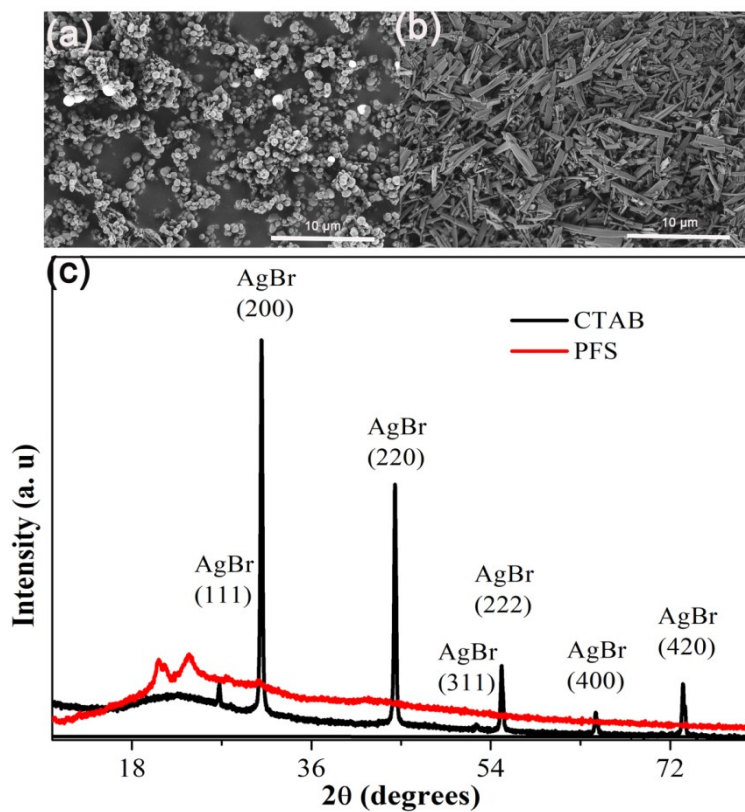

**Fig. S14.** SEM images and XRD pattern of silica synthesized by CTAB (a) and PFS (b).

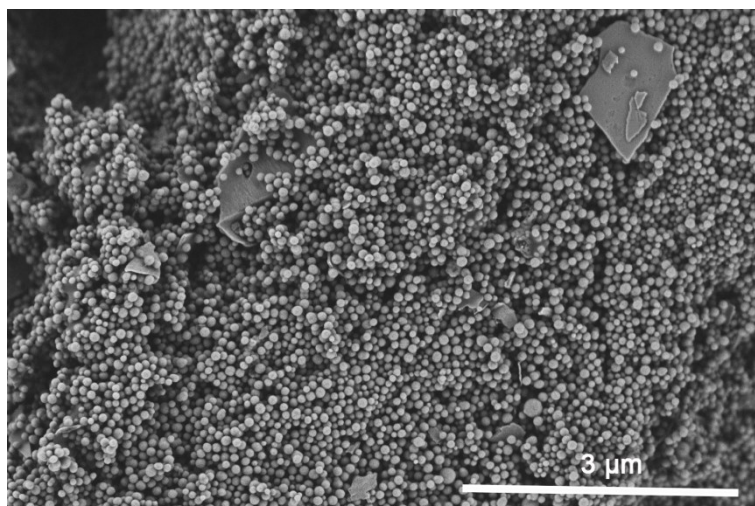

**Fig. S15.** SEM image of silica synthesized by PFS·PF<sub>6</sub><sup>-</sup>.

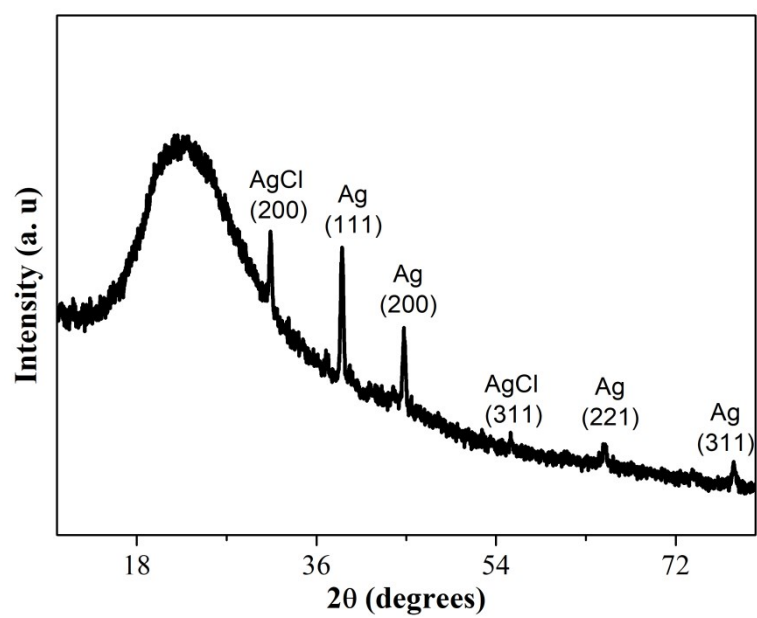

**Fig. S16.** XRD pattern of as-synthesized silica/dopamine hybrid.



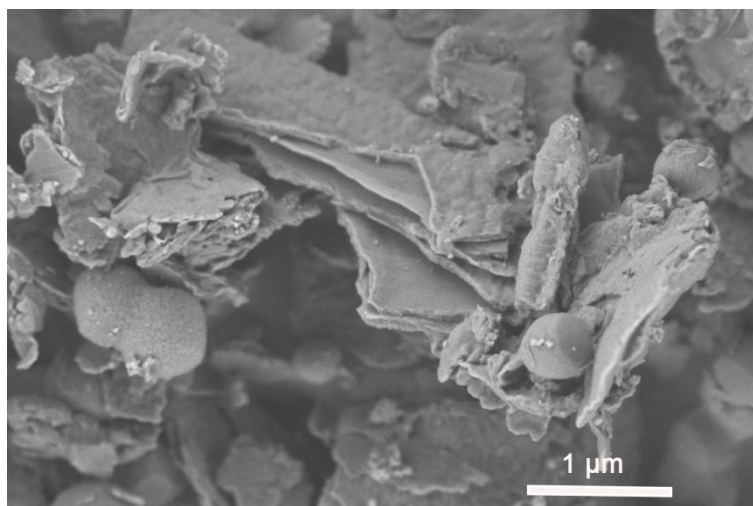

**Fig. S17.** SEM image of silica synthesized by 10ml ammonia.

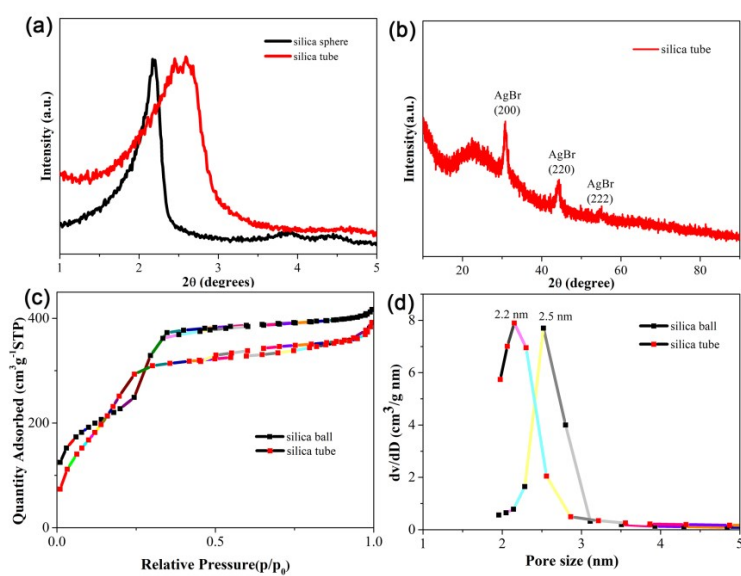

**Fig. S18.** XRD patterns and  $N_2$  adsorption-desorption isotherms of silica sphere and tube synthesized with and without silver after calcination.

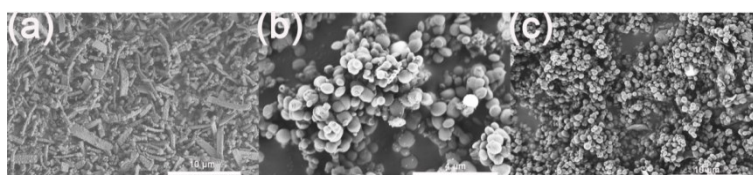

**Fig. S19.** SEM images of as-synthesized silica with different amount of silver: (a) 0.05 mmol; (b) 0.2 mmol; (c) 0.4 mmol.

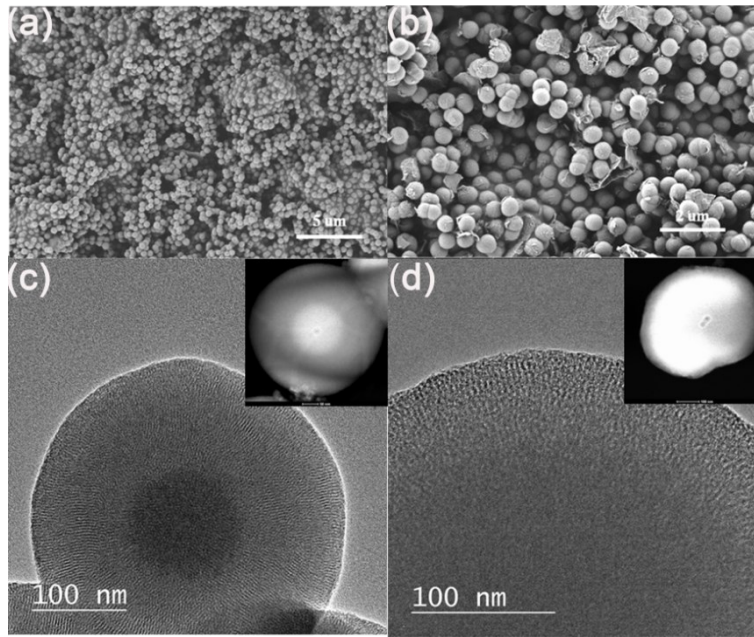

**Fig. S20.** The characterization of silica balls synthesized by the Zn and Cu ion-assisted method. (a) SEM image of Zn-silica-sphere; (b) SEM image of Cu-silica-sphere; (c) TEM and STEM images of Zn-silica-sphere; (d) TEM and STEM images of Cu-silica-sphere.

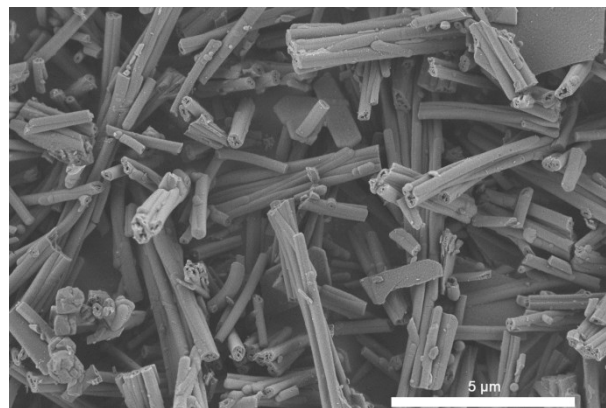

**Fig. S21.** SEM images of as-synthesized silica intermediates with silver and PFS surfactant.

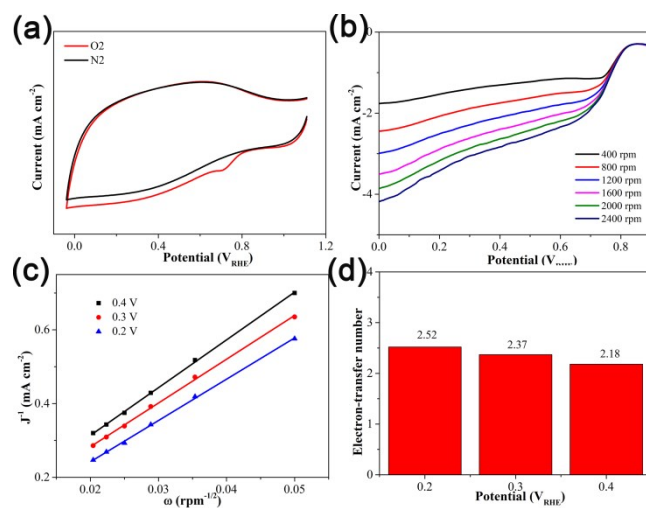

**Fig. S22.** The catalytic activity of the **SDA** towards the electrochemical reduction of oxygen in 0.1 M KOH electrolyte: (a) CV curves of **SDA** performed in O<sub>2</sub> and N<sub>2</sub>-saturated 0.1 M KOH electrolytes with a scan rate of 50 mV s<sup>-1</sup>; (b) LSV curves of **SDA** at a scan rate of 10 mV s<sup>-1</sup> with various rotation rates from 400 to 2400 rpm; (c) K-L plots derived from LSV curves of **SDA** at different electrode potentials. (d) electron-transfer number of **SDA** in ORR at 0.2V, 0.3V, and 0.4 V, respectively.

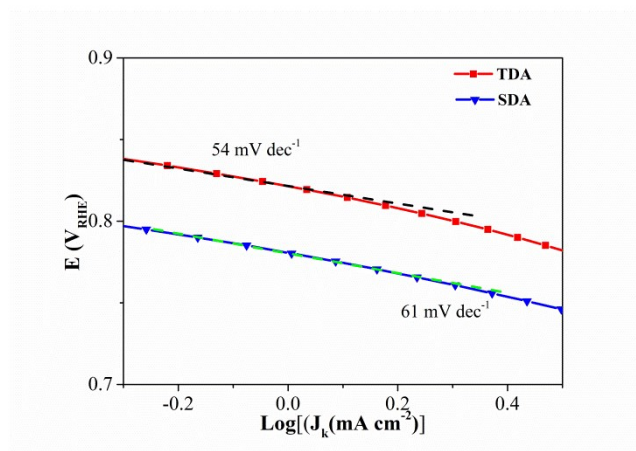

**Fig. S23.** The Tafel plot of **SDA** and **TDA** at 1600 rpm in O<sub>2</sub>-saturated 0.1 M KOH.

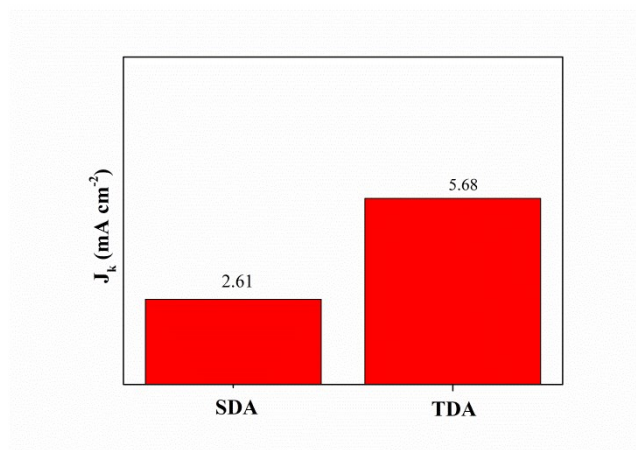

**Fig. S24.** Kinetic-limiting current density at -0.75 V of **SDA** and **TDA**. Rotating speed: 1600 rpm and scan rate: 10 mV s<sup>-1</sup>.

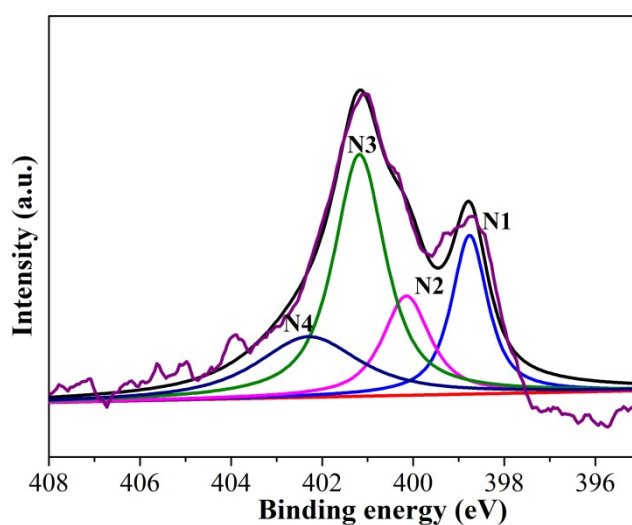

**Fig. S25.** Deconvoluted N 1s spectra of **SDA**.

**Table. S3.** The C and N content measured from elemental analysis and N dopant proportions of **SDA** and **TDA** catalysts measured from the fitting of the N 1s XPS.

| Sample     | C<br>/wt% | N<br>/wt% | Relative content of different N species / 100% |            |             |                  | $N_{(\text{pyridinic+graphitic})}$<br>/N <sub>total</sub> |
|------------|-----------|-----------|------------------------------------------------|------------|-------------|------------------|-----------------------------------------------------------|
|            |           |           | pyridinic-N                                    | pyrrolic-N | graphitic-N | pyridine-N-oxide |                                                           |
|            |           |           | (N1)                                           | (N2)       | (N3)        | (N4)             |                                                           |
| <b>SDA</b> | 92.93     | 2.42      | 0.12                                           | 0.09       | 0.64        | 0.15             | 0.76                                                      |
| <b>TDA</b> | 90.38     | 3.63      | 0.12                                           | 0.15       | 0.65        | 0.08             | 0.77                                                      |

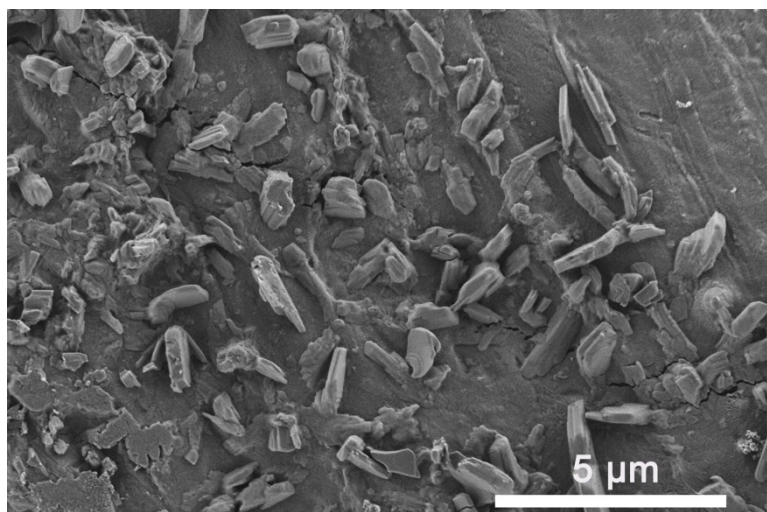

**Fig. S26.** SEM image of silica particles synthesized in the acid condition.

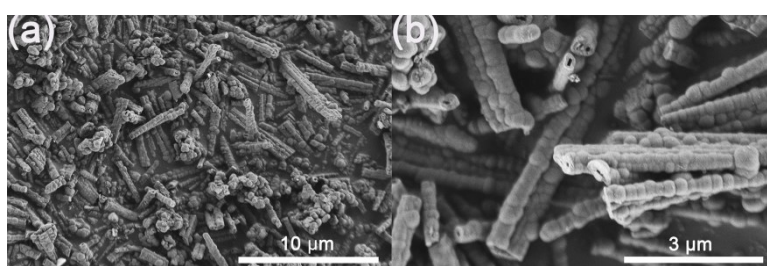

**Fig. S27.** SEM images of as-synthesized particles synthesized in the Stober-silica/carbon co-assembly with 1 mmol  $\text{Ni}^{2+}$  and 0.1 mmol  $\text{Ag}^+$ .
